# Supplementary material for: Preparing tomorrow's doctors for the genomics era: A nationwide survey of UK medical students
Source: PubMed Central journal article supplement — Future Healthc J. 2024 Apr 20;11(2):100133. doi: 10.1016/j.fhj.2024.100133 (PMC11099300; doi:10.1016/j.fhj.2024.100133), 2024-04-20
Supplement: mmc1.pdf [file mmc1.pdf]

## Demographics

Which university/medical school do you currently attend?

- University of Aberdeen
- Anglia Ruskin University
- Aston University
- Barts and the London School of Medicine
- Brighton and Sussex Medical School
- University of Bristol
- University of Cambridge
- Cardiff University
- University of Dundee
- University of Edinburgh
- University of Exeter
- University of Glasgow
- Hull York Medical School
- Imperial College London
- Keele University
- King's College London
- Lancaster University
- University of Leeds
- University of Leicester
- University of Liverpool
- University of Manchester
- University of Newcastle
- University of East Anglia
- University of Oxford
- University of Plymouth
- Queen's University Belfast
- University of Sheffield
- University of Southampton
- St George's, University of London
- Swansea University
- University College London
- University of Warwick

Which of the following best describes the main form of teaching at your medical school?

- Integrated
- Problem-Based Learning
- Traditional

In what year do you expect to graduate?

- 2023
- 2024

How old are you?

- 21
- 22
- 23
- 24
- 25
- Over 25

What is your gender?

- Male
- Female
- Non-binary
- Prefer not to say

## Genomics Educational Experience

Approximately how much teaching have you received during your medical degree on the basic sciences of genomics?

None Some Lots

-----

*(Place a mark on the scale above)*

Approximately how much teaching have you received during your medical degree on genomic medicine (the clinical application of genomics)?

None Some Lots

-----

*(Place a mark on the scale above)*

Have you had any additional genomics experience beyond your core medical school curriculum?

(Tick all that apply)

- Intercalation or other undergraduate degree
- Student selected component of your medical degree
- Research project outside of a degree (e.g. summer projects)
- Graduate degree (e.g. MSc, MPhil, PhD)
- Other
- None

## Genomics Knowledge

### How confident do you feel in your understanding of the following:

|                                                                                                                                                         | Not at all confident  | Somewhat confident    | Neutral               | Confident             | Very confident        |
|---------------------------------------------------------------------------------------------------------------------------------------------------------|-----------------------|-----------------------|-----------------------|-----------------------|-----------------------|
| The difference between DNA, genes and chromosomes                                                                                                       | <input type="radio"/> |
| Identifying inheritance patterns from family pedigrees e.g. autosomal dominant, X-linked, mitochondrial                                                 | <input type="radio"/> |
| The difference between copy number and sequence variants                                                                                                | <input type="radio"/> |
| The difference between loss-of-function and gain-of-function variants                                                                                   | <input type="radio"/> |
| The difference between synonymous and missense variants                                                                                                 | <input type="radio"/> |
| The difference between somatic and germline variants                                                                                                    | <input type="radio"/> |
| The concept of mosaicism                                                                                                                                | <input type="radio"/> |
| The difference between clinically used genomic tests, such as microarray, single gene test, gene panel, whole exome sequencing, whole genome sequencing | <input type="radio"/> |
| The concept of genetic contributions to common complex diseases such as type 2 diabetes                                                                 | <input type="radio"/> |
| How you might approach interpretation of variants eg identifying whether a variant is more likely to be pathogenic or benign                            | <input type="radio"/> |
